# Supplementary material for: Is Discordance Between Recommended and Actual Postacute Discharge Setting a Risk Factor for Readmission in Patients With Congestive Heart Failure?
Source: PubMed Central journal article supplement — J Am Heart Assoc. 2021 Jul 29;10(15):e020425. doi: 10.1161/JAHA.120.020425 (PMC8475711; doi:10.1161/jaha.120.020425), 2021-07-29
Supplement: JAH3-10-e020425-s001.pdf [file JAH3-10-e020425-s001.pdf]

# **SUPPLEMENTAL MATERIAL**

**Table S1. ICD -10 Codes for CHF.**

| <b>DIAGNOSIS CODE</b> | <b>DIAGNOSIS DESCRIPTION</b>                                                                                                                               |
|-----------------------|------------------------------------------------------------------------------------------------------------------------------------------------------------|
| I43                   | Cardiomyopathy in diseases classified elsewhere                                                                                                            |
| I50                   | Heart failure                                                                                                                                              |
| I099                  | Hypertensive heart disease with heart failure                                                                                                              |
| I110                  | Hypertensive heart disease with heart failure                                                                                                              |
| I130                  | Hypertensive heart and chronic kidney disease with heart failure and stage 1 through stage 4 chronic kidney disease, or unspecified chronic kidney disease |
| I132                  | Hypertensive heart and chronic kidney disease with heart failure and with stage 5 chronic kidney disease, or end stage renal disease                       |
| I255                  | Ischemic cardiomyopathy                                                                                                                                    |
| I420                  | Dilated cardiomyopathy                                                                                                                                     |
| I425                  | Other restrictive cardiomyopathy                                                                                                                           |
| I426                  | Alcoholic cardiomyopathy                                                                                                                                   |
| I427                  | Cardiomyopathy due to drug and external agent                                                                                                              |
| I428                  | Other cardiomyopathies                                                                                                                                     |
| I429                  | Cardiomyopathy, unspecified                                                                                                                                |
| P290                  | Neonatal cardiac failure                                                                                                                                   |

**Table S2. Variable Definitions and Specifications for Modelling.**

| Variable                           | Definition                                                                                                                                                                                                                                                                           | Source                                           |
|------------------------------------|--------------------------------------------------------------------------------------------------------------------------------------------------------------------------------------------------------------------------------------------------------------------------------------|--------------------------------------------------|
| <b>Demographics</b>                |                                                                                                                                                                                                                                                                                      |                                                  |
| Sex                                | Categorized as: Male, Female                                                                                                                                                                                                                                                         | UPMC Discharge and Inpatient Billing Data        |
| Race                               | Categorized as: White, Black, Other<br>Missing data replaced with "white"                                                                                                                                                                                                            | UPMC Discharge and Inpatient Billing Data        |
| Age                                | Categorized as: 18 – 55 years, 56 – 65 years, 66 – 75 years, 76 – 85 years, 86 years and older                                                                                                                                                                                       | UPMC Discharge and Inpatient Billing Data        |
| Marital Status                     | Categorized as: Married, Not Married; missing data replaced with "married"                                                                                                                                                                                                           |                                                  |
| Insurance                          | Categorized as: Commercial, Medicare, Medicaid, Self-Pay, Other (e.g., veterans administration, auto insurance payers and homeowners liability claims)                                                                                                                               | UPMC Discharge and Inpatient Billing Data        |
| Median Household Income            | Based on patient ZIP code and categorized based on the quartile distribution; median value imputed for missing data                                                                                                                                                                  | Census Data                                      |
| <b>Clinical</b>                    |                                                                                                                                                                                                                                                                                      |                                                  |
| Length of stay                     | Categorized as: 0 – 3 days, >3 – 6 days, >7 – 9 days, >9 days based on quartile distribution                                                                                                                                                                                         | UPMC Discharge and Inpatient Billing Data        |
| ICU use                            | Yes/no: Intensive care unit use during inpatient stay                                                                                                                                                                                                                                | UPMC Discharge and Inpatient Billing Data        |
| Severity of Illness                | APR-DRG classification: categorized as minor, moderate, major, extreme                                                                                                                                                                                                               | UPMC Discharge and Inpatient Billing Data        |
| Risk of Mortality                  | APR-DRG classification: categorized as minor, moderate, major, extreme; mean value imputed for missing data                                                                                                                                                                          | UPMC Discharge and Inpatient Billing Data        |
| Indicators for comorbidities       | Yes/no: peripheral vascular disease, chronic pulmonary disease, diabetes (complicated), renal failure, liver disease, coagulopathy, obesity, blood loss anemia, alcohol abuse, drug abuse, depression, neurological disorder, and cancer                                             | UPMC Discharge and Inpatient Billing Data        |
| Elixhauser comorbidity count       | Ranges from 0 – 31; categorized as: 3 or less, 4 – 5, 6 – 7, 8 or more                                                                                                                                                                                                               | UPMC Discharge and Inpatient Billing Data        |
| AM-PAC Mobility Score              | Categorized by functional mobility limitations: 6 –unable to perform any tasks, 7-13 – major mobility limitations, 14-18 - moderate mobility limitations, 19-23 – minor mobility limitations, 24 – no mobility limitations<br>Moderate mobility limitations imputed for missing data | UPMC Electronic Health Record                    |
| Discharge Destination              | Categorized as: Home: home with outpatient services or without home health services, Home Health: Home with home health services, Post-Acute Care facility: Skilled nursing facility or Inpatient rehabilitation facility                                                            | UPMC Electronic Health Record                    |
| Therapy Visits (amount)            | Categorized as: total number of visits from PT or OT: 1-3 visits, 4-6 visits, 7 or more visits                                                                                                                                                                                       | UPMC Discharge and Inpatient Billing Data        |
| Therapist Recommendation Agreement | Categorized as: agreed (PT and OT recommendation exactly the same), disagree (PT and OT recommendation not the same)                                                                                                                                                                 | UPMC Electronic Health Record                    |
| <b>Outcomes</b>                    |                                                                                                                                                                                                                                                                                      |                                                  |
| Died within 30 days                | Yes/no: Died within 30 days with or without an in-system readmission                                                                                                                                                                                                                 | Social Security Death Index (SSDI)               |
| Within system 30-day Readmission   | Yes/no: Readmitted to a UPMC hospital within 30 days                                                                                                                                                                                                                                 | UPMC Discharge and Inpatient Billing Data        |
| Readmitted or died within 30 days  | Yes/no: Readmitted within system or died within 30 days                                                                                                                                                                                                                              | UPMC Discharge and Inpatient Billing Data & SSDI |

**Table S3. Therapist Recommended Post-acute Setting versus Actual Discharge Setting, 4-level definition**

| Therapist-Recommendations |      | Actual Discharge Setting |    |                                |     |
|---------------------------|------|--------------------------|----|--------------------------------|-----|
|                           |      | Community (Comm)         |    | Post-Acute Care Facility (PAC) |     |
| Comm                      | Home | Home                     | HH | SNF                            | IRF |
|                           | HH   | Home                     | HH | SNF                            | IRF |
| PAC                       | SNF  | Home                     | HH | SNF                            | IRF |
|                           | IRF  | Home                     | HH | SNF                            | IRF |

: Home: Home without home services, HH: Home with home health services, PAC: Post-acute care facilities, Comm: Community setting

Red shading: actual discharge setting is discordant when setting is less intensive than therapist recommendation

Green shading: actual discharge setting is concordant when setting is equal to or more intensive than therapist recommendation

**Table S4. CHF: Patient Demographic & Clinical Characteristics between Definitive vs. Unclear vs. Missing Discharge recommendations (N=39 220).**

|                                         | <b>Definite DC Rec<br/>(N= 26 798<sup>a</sup>)</b> | <b>Unclear<br/>(N=2 516)</b> | <b>Missing<br/>(N=9 906)</b> | <b>Total (N=39 220)</b> |
|-----------------------------------------|----------------------------------------------------|------------------------------|------------------------------|-------------------------|
| Age, n (%)                              |                                                    |                              |                              |                         |
| 18-55                                   | 1 518 (5.7)                                        | 120 (4.8)                    | 763 (7.7)                    | 2 401 (6.1)             |
| 56-65                                   | 3 828 (14.3)                                       | 304 (12.1)                   | 1 656 (16.7)                 | 5 788 (14.8)            |
| 66-75                                   | 6 422 (24.0)                                       | 471 (18.7)                   | 2 512 (25.4)                 | 9 405 (24.0)            |
| 76-85                                   | 8 162 (30.5)                                       | 704 (28.0)                   | 2 760 (27.9)                 | 11 626 (29.6)           |
| 86+                                     | 6 868 (25.6)                                       | 917 (36.5)                   | 2 215 (22.4)                 | 10 000 (25.5)           |
| Sex, n (%)                              |                                                    |                              |                              |                         |
| Male                                    | 12 242 (45.7)                                      | 1027 (40.8)                  | 4 784 (48.3)                 | 18 053 (46.0)           |
| Female                                  | 14 556 (54.3)                                      | 1 489 (59.2)                 | 5 122 (51.7)                 | 21 167 (54.0)           |
| Race, n (%)                             |                                                    |                              |                              |                         |
| White                                   | 23 913 (89.2)                                      | 2 229 (88.6)                 | 8 658 (87.4)                 | 34 800 (88.7)           |
| Black                                   | 2 639 (9.9)                                        | 263 (10.5)                   | 1 148 (11.6)                 | 4 050 (10.3)            |
| Other                                   | 246 (0.9)                                          | 24 (1.0)                     | 100 (1.0)                    | 370 (0.9)               |
| Hospital LOS, Mean (SD)                 | 8.7 (7.9)                                          | 7.1 (6.4)                    | 5.4 (7.3)                    | 7.8 (7.8)               |
| Median (IQR)                            | 6.8 (4.2-10.4)                                     | 5.7 (3.8-8.5)                | 3.7 (2.3-6.1)                | 5.8 (3.7-9.5)           |
| % ICU Use, n (%)                        | 7 867 (29.4)                                       | 572 (22.7)                   | 1 424 (14.4)                 | 9 863 (25.2)            |
| Mean (SD) ICU days <sup>b</sup>         | 4.9 (6.8)                                          | 4.5 (5.2)                    | 3.1 (13.5)                   | 4.6 (8.0)               |
| Median Income by ZIP code, Mean (SD)    | 47 816.5<br>(15 789.2)                             | 47 198.1<br>(15 229.3)       | 47 229.6<br>(1 5267.4)       | 47 628.6<br>(15 625.5)  |
| AM-PAC mobility, n (%)                  |                                                    |                              |                              |                         |
| 6 (Total Assistance)                    | 1 659 (6.2)                                        | 144 (5.7)                    | 400 (4.0)                    | 2 203 (5.6)             |
| 7-13 (Major Limitations)                | 7 574 (28.3)                                       | 688 (27.3)                   | 1 469 (14.8)                 | 9 731 (24.8)            |
| 14-18 (Moderate limitations)            | 8 126 (30.3)                                       | 896 (35.6)                   | 2 510 (25.3)                 | 11 532 (29.4)           |
| 19-23 (Minor limitations)               | 5 112 (19.1)                                       | 468 (18.6)                   | 2 451 (24.7)                 | 8 031 (20.5)            |
| 24 (Total independence)                 | 2 928 (10.9)                                       | 205 (8.2)                    | 1 841 (18.6)                 | 4 974 (12.7)            |
| Missing, n (%)                          | 1 479 (5.5)                                        | 138 (5.5)                    | 344 (3.5)                    | 1 961 (5.0)             |
| Elixhauser Comorbidity Index, Mean (SD) | 6.9 (2.1)                                          | 6.8 (2.1)                    | 6.3 (2.0)                    | 6.7 (2.1)               |
| Median (IQR)                            | 7 (5-8)                                            | 7 (5-8)                      | 6 (5-8)                      | 7 (5-8)                 |

HH: Home health; PAC: Post-acute care facility; AM-PAC: activity measure for post-acute care; DC: Discharge; LOS: length of stay; ICU: intensive care unit

<sup>a</sup>including patients who died within 30 days without a readmission preceding the event (n=1 298)

<sup>b</sup>conditional on ICU use

**Table S5. Full model\*: Outcome readmission at 30 days (N=25 500).**

| Variable                    | Odds Ratio | 2.50% | 97.50% | P-value |
|-----------------------------|------------|-------|--------|---------|
| Concordant                  | 1.00       | ---   | ---    | ---     |
| Discordant                  | 1.12       | 1.04  | 1.20   | 0.002   |
| Male                        | 0.99       | 0.93  | 1.05   | 0.702   |
| Race: White                 | 1.00       | ---   | ---    | ---     |
| Black                       | 1.16       | 1.05  | 1.29   | 0.003   |
| Other                       | 0.75       | 0.54  | 1.04   | 0.086   |
| Age: 18 - 55 years          | 1.00       | ---   | ---    | ---     |
| 56 - 65 years               | 1.02       | 0.88  | 1.17   | 0.815   |
| 66 - 75 years               | 0.98       | 0.84  | 1.14   | 0.788   |
| 76 - 85 years               | 1.02       | 0.88  | 1.18   | 0.833   |
| >85 years                   | 0.93       | 0.79  | 1.09   | 0.351   |
| Marital Status: Not Married | 1.00       | ---   | ---    | ---     |
| Married                     | 0.91       | 0.86  | 0.97   | 0.005   |
| Insurance: Commercial       | 1.00       | ---   | ---    | ---     |
| Medicare                    | 1.07       | 0.99  | 1.16   | 0.068   |
| Medicaid                    | 1.14       | 0.98  | 1.33   | 0.088   |
| Self-Pay                    | 1.11       | 0.54  | 2.31   | 0.770   |
| Other                       | 0.82       | 0.61  | 1.11   | 0.193   |
| Median Household Income Q1  | 1.00       | ---   | ---    | ---     |
| Median Household Income Q2  | 1.00       | 0.91  | 1.09   | 0.999   |
| Median Household Income Q3  | 1.09       | 1.00  | 1.19   | 0.042   |
| Median Household Income Q4  | 1.14       | 1.05  | 1.25   | 0.003   |
| Length of stay: 0-3 days    | 1.00       | ---   | ---    | ---     |
| 4-6 days                    | 1.07       | 0.98  | 1.17   | 0.138   |
| 7-9 days                    | 1.24       | 1.12  | 1.38   | < 0.001 |
| >9 days                     | 1.34       | 1.19  | 1.50   | < 0.001 |
| Intensive Care Unit use     | 1.00       | 0.93  | 1.08   | 0.968   |
| Severity of Illness: minor  | 1.00       | ---   | ---    | ---     |
| moderate                    | 1.01       | 0.76  | 1.35   | 0.952   |
| major                       | 1.16       | 0.86  | 1.55   | 0.328   |
| extreme                     | 1.23       | 0.90  | 1.67   | 0.189   |
| Risk of Mortality: minor    | 1.00       | ---   | ---    | ---     |
| moderate                    | 0.87       | 0.55  | 1.40   | 0.575   |
| major                       | 0.94       | 0.59  | 1.51   | 0.807   |
| extreme                     | 0.96       | 0.59  | 1.55   | 0.864   |

*\*controlling for demographics, insurance, median income, comorbidities, length of stay, ICU use, mortality risk, illness severity, AM-PAC mobility scores only, total visits from physical and occupational therapy*

**Table S5. Full model\*: Outcome readmission at 30 days (N=25 500) (continued)**

| Variable                         | Odds Ratio | 2.50%  | 97.50% | P-value |
|----------------------------------|------------|--------|--------|---------|
| Comorbidities                    |            |        |        |         |
| Peripheral Vascular Disease      | 1.09       | 1.02   | 1.17   | 0.013   |
| Chronic Pulmonary Disease        | 1.10       | 1.04   | 1.18   | 0.002   |
| Diabetes (complicated)           | 1.10       | 1.02   | 1.17   | 0.009   |
| Renal Failure                    | 1.19       | 1.11   | 1.27   | < 0.001 |
| Liver Disease                    | 1.10       | 0.98   | 1.24   | 0.105   |
| Coagulopathy                     | 1.07       | 0.97   | 1.17   | 0.161   |
| Obesity                          | 0.96       | 0.89   | 1.04   | 0.331   |
| Blood loss anemia                | 1.02       | 0.82   | 1.26   | 0.875   |
| Alcohol Abuse                    | 0.82       | 0.69   | 0.98   | 0.030   |
| Drug Abuse                       | 1.04       | 0.85   | 1.28   | 0.695   |
| Depression                       | 1.06       | 0.99   | 1.14   | 0.094   |
| Neurological Disorder            | 0.89       | 0.82   | 0.97   | 0.007   |
| Cancer                           | 1.25       | 1.12   | 1.39   | < 0.001 |
| Elixhauser comorbidity index:    |            |        |        |         |
| 0-3 comorbidities                | 1.00       | ---    | ---    | ---     |
| 4-5 comorbidities                | 1.21       | 1.02   | 1.45   | 0.034   |
| 6-7 comorbidities                | 1.20       | 1.00   | 1.43   | 0.051   |
| 8+ comorbidities                 | 1.44       | 1.18   | 1.75   | < 0.001 |
| AM-PAC mobility: 6: total assist |            |        |        |         |
| 7-13: major limitations          | 1.07       | 0.94   | 1.22   | 0.310   |
| 14-18: moderate limitations      | 1.11       | 0.97   | 1.27   | 0.127   |
| 19-23: minor limitations         | 1.00       | 0.87   | 1.15   | 0.959   |
| 24: total independence           | 0.90       | 0.77   | 1.04   | 0.153   |
| <i>missing</i>                   | 0.30       | 0.23   | 0.38   | < 0.001 |
| 1-3 therapist visits             |            |        |        |         |
| 4-6 therapist visits             | 0.93       | 0.86   | 1.00   | 0.055   |
| 7 or more therapist visits       | 0.92       | 0.84   | 1.02   | 0.100   |
| Constant                         | 0.16       | 0.09   | 0.28   | < 0.001 |
| Hospital Variance                | 0.0027     | 0.0004 | 0.02   | ---     |

*controlling for demographics, insurance, median income, comorbidities, length of stay, ICU use, mortality risk, illness severity, AM-PAC mobility scores only, total visits from physical and occupational therapy*

**Table S6. Sensitivity Analyses: Comparing discordance classifications on 30-day readmission outcome\***

|                           |                                                                     | 30-Day readmission |        |       |         |                |        |      |                 |            |        |      |         |
|---------------------------|---------------------------------------------------------------------|--------------------|--------|-------|---------|----------------|--------|------|-----------------|------------|--------|------|---------|
|                           |                                                                     | Full Model         |        |       |         | Mobility - Low |        |      | Mobility - High |            |        |      |         |
|                           |                                                                     | ODDS RATIO         | 95% CI |       | P-value | ODDS RATIO     | 95% CI |      | P-value         | ODDS RATIO | 95% CI |      | P-value |
| <b>Concordant</b>         |                                                                     | 1.00               | -      | -     | -       | 1.00           | -      | -    | -               | 1.00       | -      | -    | -       |
| <b>Discordance models</b> | <b>3-level, less# (Final model) n=25 500</b>                        | 1.12               | 1.04   | 1.20  | 0.002   | 1.20           | 1.08   | 1.33 | 0.001           | 1.10       | 0.99   | 1.22 | 0.064   |
|                           | 3-level, less# (with post-discharge deaths)@, n= 26 798             | 1.07               | 1.00   | 1.15  | 0.058   | 1.11           | 1.01   | 1.23 | 0.036           | 1.08       | 0.98   | 1.19 | 0.125   |
|                           | 3-level, less# (excluding all imputed missing variables), n= 24 508 | 1.13               | 1.05   | 1.22  | 0.001   | 1.16           | 1.04   | 1.29 | 0.006           | 1.07       | 0.97   | 1.19 | 0.162   |
|                           | 4-level, less#, n=25 500                                            | 1.06               | 0.99   | 1.13  | 0.089   | 1.13           | 1.03   | 1.24 | 0.011           | 1.01       | 0.92   | 1.11 | 0.820   |
|                           | 3-level, less# (primary diagnosis CHF only), n=4 480                | 1.18               | 1.01   | 1.039 | 0.038   | 1.12           | 0.87   | 1.45 | 0.370           | 1.27       | 1.03   | 1.57 | 0.026   |

\*controlling for demographics, insurance, median income, comorbidities, length of stay, ICU use, mortality risk, illness severity, AM-PAC mobility scores only, total visits from physical and occupational therapy

#Less= actual discharge setting is discordant when setting is less intensive than therapist recommendation

@outcome: readmission or death



**Figure S1. Cohort Diagram.**

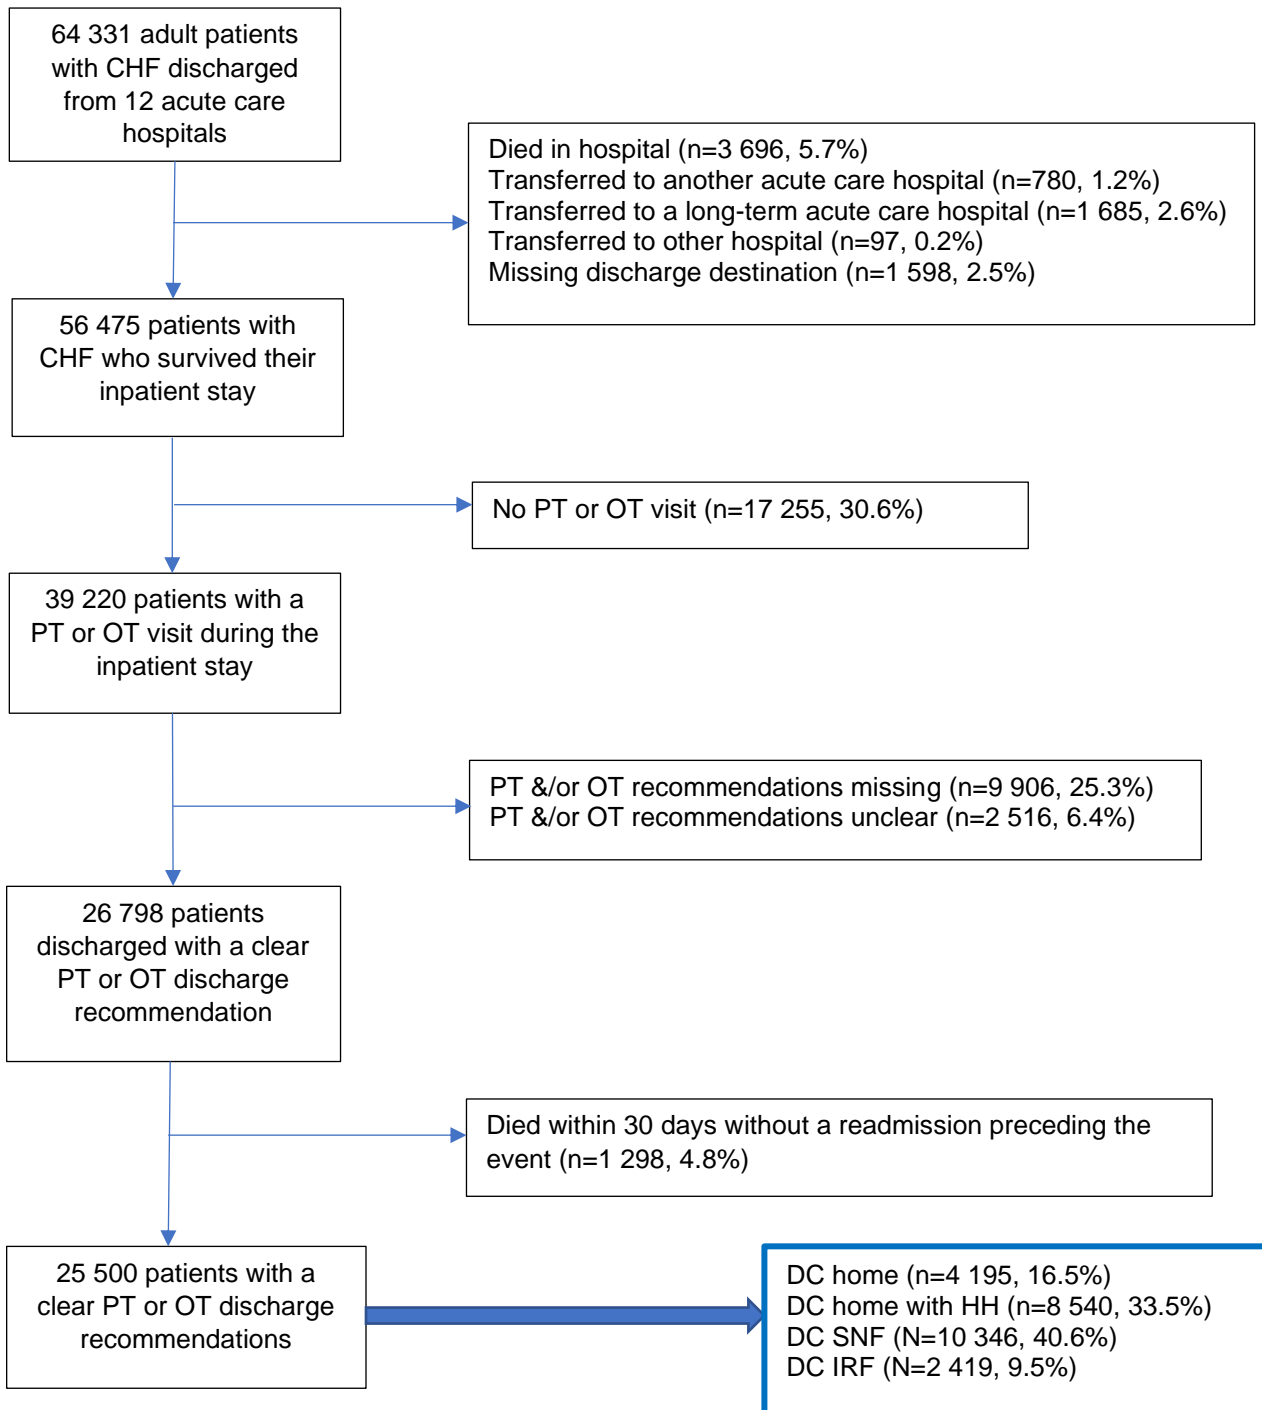

CHF, Congestive Heart Failure; PT, physical therapist; OT, occupational therapist; DC, discharge; HH, home health; SNF, skilled nursing facility; IRF, inpatient rehabilitation facility
